# Supplementary material
Source: MDPI journal article supplement (https://www.mdpi.com/2073-4344/10/12/1480)
Supplement: s1 [file s1]

# Supplementary Materials

## An Accurate Growth Mechanism and Photocatalytic Degradation Rhodamine B of Crystalline Nb<sub>2</sub>O<sub>5</sub> Nanotube Arrays

Wei Guo, Libin Yang \*, Jinghao Lu, Peng Gao, Wenjing Li and Zhiying Feng

Tianjin Key Laboratory of Brine Chemical Engineering and Resource Eco-utilization, College of Chemical Engineering and Materials Science, Tianjin University of Science and Technology, Tianjin 300457, China; weiguo@mail.tust.edu.cn (W.G.); jhlu@mail.tust.edu.cn (J.L.); gp18822057594@outlook.com (P.G.); lwj0606s@mail.tust.edu.cn (W.L.); zhing@mail.tust.edu.cn (Z.F.)

\* Correspondence: yanglibin@tust.edu.cn; Tel.: +860-226060-1110

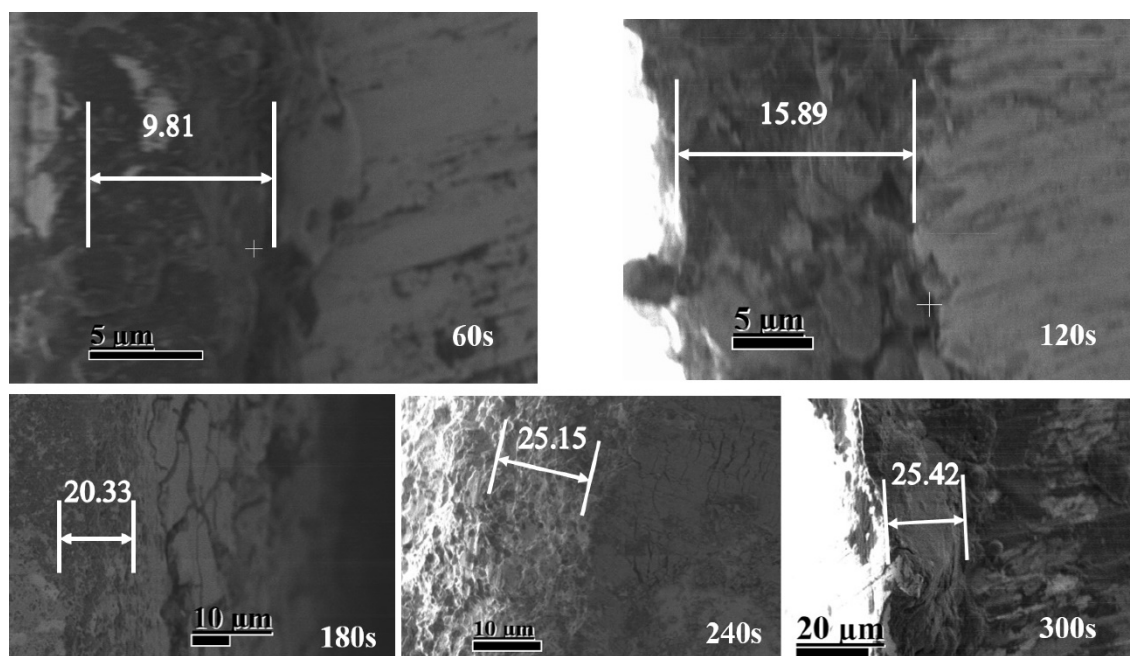

**Figure S1.** SEM images for the thickness of the oxide layer in stage II.

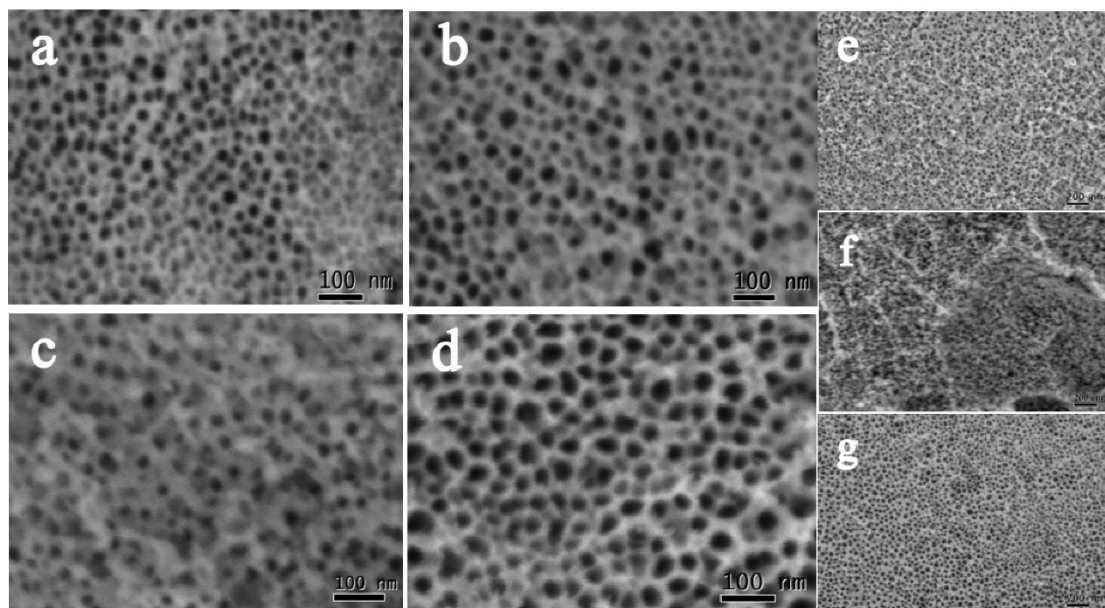

**Figure S2.** High-resolution SEM images of the anodic oxide layers formed by anodization of Nb foils at 20V in the ethylene glycol electrolytes with the concentrations of  $\text{NH}_4\text{F}$  at 0.25(a), 0.3(b), 0.35(c), and 0.4(d) M  $\text{NH}_4\text{F}$ ; and the water contents in 0.35 M  $\text{NH}_4\text{F}$  at 0.5(e), 1.0(f) and 2(g) vol%.

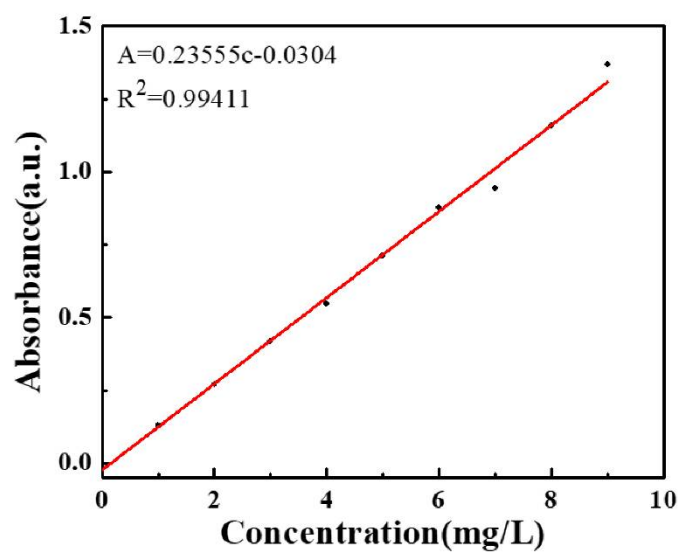

**Figure S3.** Standard curve of Rhodamine B solution.

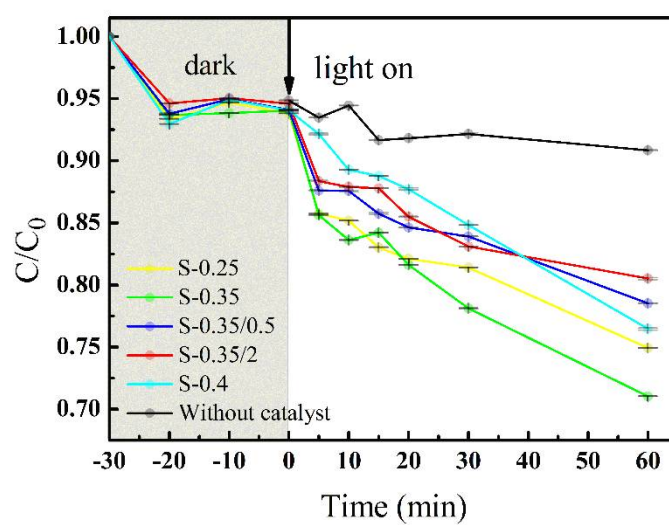

**Figure S4.** Rh B degradation by different samples under dark conditions and UV irradiation by 300 watts xenon lamp.
